# Supplementary material for: Solvent switchable dual emission from a bichromophoric ruthenium–BODIPY complex
Source: Royal Society of Chemistry journal article supplement (doi:10.1039/c5cc07135f), 2015-01-01
Supplement: c5cc07135f1.pdf [file c5cc07135f1.pdf]

# Solvent Switchable Dual Emission from a Bichromophoric Ruthenium-BODIPY complex.

A.Martin, A. Byrne, C. Dolan, R. J. Forster and T. E. Keyes

Electronic Supporting Information

## Experimental

### Materials

All materials were purchased from Sigma Ireland, and used without further purification unless otherwise noted.

### General procedures.

Anhydrous  $\text{MgSO}_4$  was used to dry all organic extracts. All volatiles were removed under reduced pressure. All reaction mixtures and column eluents were monitored by colour and TLC using commercial glass backed thin layer chromatography (TLC) plates (Kieselgel 60 F254). The plates were observed under UV light at 254 and 365 nm. Flash column chromatography was used throughout for all separations using silica gel (LC60A35-70  $\mu\text{M}$ ). High performance liquid chromatography (HPLC) was performed using a Varian LC 940 series with a Hichrom C18 250 x 4.6 mm column fitted with a photodiode array detector (150-900 nm), a 50  $\mu\text{l}$  injection loop, auto sampler and auto collector. Dual detection wavelength was set for 280 nm. The mobile phase was of HPLC grade quality, filtered and purged with nitrogen prior to use. Mobile phase A consisted of deionised water (with 0.1% v/v trifluoroacetic acid (TFA)) and mobile phase B contained acetonitrile (with 0.1% v/v TFA). The mobile phase gradient was initially set for 5%:95% (solvent A:solvent B) and ended up as a 50%:50% (solvent A:solvent B) mixture over the 45 min run time. Samples were also filtered (0.8  $\mu\text{m}$  pore size) prior to injection. UV-vis spectra were obtained on a Jasco V-670 spectrophotometer. Fluorescence spectra were collected on a Varian Cary eclipse fluorescence spectrometer. The emission lifetimes were collected on a Fluotime 100 spectrometer with a 450 nm laser pulsed from a PDC 800-B. NMR spectra were recorded either at 400 and 100 MHz, respectively or at 600 and 150 MHz, respectively from a Bruker instrument. Deuteriated solvents were used for homonuclear lock, and the signals are referenced to the deuteriated solvent peaks. HR-MS analysis was carried out in Chemistry and Chemical Biology Laboratory, University College Dublin.

### Synthesis;

**4-(1,10-phenanthroline-6-yl) benzaldehyde (3)** To 5-bromo-1,10-phenanthroline (**1**) (400 mg, 1.5 mmol) was added 4-formylphenyl boronic acid (300 mg, 2.0 mmol),  $\text{Pd(dppf)}_2 \text{Cl}_2 \cdot \text{DCM}$  (120 mg, 0.4 mmol) in Dioxane (4 ml) and stirred. Following this  $\text{K}_2\text{CO}_3$  (424 mg, 3.0 mmol) in  $\text{H}_2\text{O}$  (1 ml) was added and the reaction mixture heated to reflux for 6 h (TLC). The reaction mixture was then cooled

and diluted to 25 ml with DCM and dried over  $\text{MgSO}_4$  and concentrated to dryness. The residue was then dissolved in DCM and purified on silica gel using DCM:MeOH (9:1). The product was then triturated from hot  $\text{CHCl}_3$  with cold pentane to yield **(3)** (382 mg, 72 %) as an off white solid,  $R_f$  0.3 (DCM:MeOH 9.5:0.5);  $\delta_{\text{H}}$  (400 MHz;  $\text{CDCl}_3$ ) 10.17 (s, 1H, CHO), 9.26 (t,  $J = 1.7$  Hz, 1H, Ar-H), 9.24 (t,  $J = 1.6$  Hz, 1H, Ar-H), 8.30 (dd,  $J = 1.7$  & 8.1 Hz, 1H, Ar-H), 8.23 (dd,  $J = 1.5$  & 8.4 Hz, 1H, Ar-H), 8.09 (d,  $J = 8.1$  Hz, 2H, Ar-H), 7.79 (s, 1H, Ar-H), 7.74 (d,  $J = 8.1$  Hz, 2H, Ar-H), 7.70 (dd,  $J = 4.4$  & 8.0 Hz, 1H, Ar-H), 7.63 (dd,  $J = 4.3$  & 8.3 Hz, 1H, Ar-H);  $^{13}\text{C}$  NMR ( $\text{CDCl}_3$ )  $\delta$  191.7, 150.8, 150.4, 146.5, 146.0, 145.2, 137.5, 136.1, 135.9, 134.0, 130.7, 130.0, 127.8, 127.3, 126.9, 123.6, 123.0 PPM; HR MS (TOF MS  $\text{ES}^+$ ):  $m/z = 285.1034$  Calcd for ( $\text{C}_{19}\text{H}_{12}\text{N}_2\text{O} + \text{H}^+$ ) = 285.1028.

**Ethyl (2,2'-bipyridin-4-yl) benzoate (4)** To 4-bromo-2,2'-bipyridine **(2)** (250 mg, 1.1 mmol) was added 4-ethoxycarbonylphenyl boronic acid (236 mg, 1.2 mmol),  $\text{Pd}(\text{dppf})_2 \cdot \text{Cl}_2$ ·DCM (86 mg, 0.1 mmol) in Dioxane (3.5 ml) and stirred. Following this  $\text{K}_2\text{CO}_3$  (292 mg, 2.1 mmol) in  $\text{H}_2\text{O}$  (0.5 ml) was added and the reaction mixture heated to reflux for 4 h (TLC). The reaction mixture was then cooled and diluted to 25 ml with DCM and dried over  $\text{MgSO}_4$  and concentrated to dryness. The residue was then dissolved in DCM and purified on silica gel using DCM:MeOH (9:1). The product was then triturated from hot  $\text{CHCl}_3$  with cold pentane to yield **(4)** (234 mg, 70 %) as an off white solid;  $\delta_{\text{H}}$  (600 MHz;  $\text{CDCl}_3$ ) 8.68 (d,  $J = 5.0$  Hz, 1H, Ar-H), 8.64 (dd,  $J = 1.0$  & 3.8 Hz, 1H, Ar-H), 8.62 (d,  $J = 1.2$  Hz, 1H, Ar-H), 8.39 (d,  $J = 7.9$  Hz, 1H, Ar-H), 8.10 (d,  $J = 8.4$  Hz, 2H, Ar-H), 7.78 (td,  $J = 1.8$  & 7.6 Hz, 1H, Ar-H), 7.76 (d,  $J = 8.4$  Hz, 2H, Ar-H), 7.49 (dd,  $J = 1.8$  & 5.0 Hz, 1H, Ar-H), 7.28 (dddd,  $J = 1.1, 2.7$  & 4.9 Hz, 1H, Ar-H), 4.35 (q,  $J = 7.0$  Hz, 2H,  $\text{CH}_2\text{CH}_3$ ), 1.36 (t,  $J = 7.0$  Hz, 3H,  $\text{CH}_2\text{CH}_3$ );  $^{13}\text{C}$  NMR ( $\text{CDCl}_3$ )  $\delta$  166.2, 156.9, 155.9, 149.8, 149.2, 148.3, 142.6, 137.0, 130.9, 130.3, 127.2, 123.9, 121.7, 121.3, 119.1, 61.2, 14.4 ppm. HR MS (TOF MS  $\text{ES}^+$ ):  $m/z = 305.1282$  Calcd for ( $\text{C}_{19}\text{H}_{17}\text{N}_2\text{O}_2 + \text{H}^+$ ) = 305.1290.

**(2,2'-bipyridin-4-yl) benzoic acid (6)** To compound **(4)** (200 mg, 0.6 mmol) was added DCM (6 ml) and stirred. Following this a solution of crushed NaOH (100 mg, 2.5 mmol) in MeOH (0.73 ml) was added and the solution stirred until full consumption of starting material (TLC). The solvent was then removed *in vacuo* to yield a gel like residue which was dissolved in  $\text{H}_2\text{O}$  (12.5 ml) and neutralised with 1M HCL and filtered. The product was then washed with  $\text{H}_2\text{O}$  and residual water was sublimed to yield **(6)** (90%) as a peach colored solid;  $\delta_{\text{H}}$  (400 MHz;  $\text{DMSO}-d_6$ ) 13.19 (bs, 1H, COOH), 8.77 (d,  $J = 5.0$  Hz, 1H, Ar-H), 8.73 (d,  $J = 4.0$  Hz, 1H, Ar-H), 8.70 (d,  $J = 1.0$  Hz, 1H, Ar-H), 8.45 (d,  $J = 8.0$  Hz, 1H, Ar-H), 8.09 (d,  $J = 8.4$  Hz, 2H, Ar-H), 7.99 (m, 3H, Ar-H), 7.82 (dd,  $J = 1.7$  & 5.1 Hz, 1H, Ar-H), 7.50 (m, 1H, Ar-H);  $^{13}\text{C}$  NMR ( $\text{DMSO}-d_6$ )  $\delta$  166.8, 153.1, 152.1, 149.3, 148.7, 147.9, 140.6, 139.8, 131.8, 130.6,

127.5, 125.5, 122.7, 122.1, 119.1 ppm; HR MS (TOF MS ES<sup>+</sup>):  $m/z$  = 277.0983 Calcd for (C<sub>17</sub>H<sub>12</sub>N<sub>2</sub>O<sub>2</sub> + H<sup>+</sup>) = 277.0977.

**1,3,5,7-tetramethyl-5-phenanthroline-4,4'-difluoroboradiazaindacene (5)** 5-phenanthroline benzaldehyde (**3**) (300 mg, 1.1 mmol) was added to N<sub>2</sub> purged DCM (60 ml) with 2,4-dimethylpyrrole (230 mg, 2.4 mmol) with TFA (cat). The reaction mixture was stirred at r.t for 5 h (TLC). Added to this was *p*-chloroanil (270 mg) in DCM (20 ml) and stirred for 30 min followed by the addition of Et<sub>3</sub>N and BF<sub>3</sub>·OEt<sub>2</sub> (2.76 ml) and the reaction mixture stirred overnight. The crude reaction mixture was washed with H<sub>2</sub>O (2 x 50 ml) and concentrated to a residue which was purified on silica gel by flash chromatography (DCM:MeOH 95/5) trituration of the isolated fraction from hot CHCl<sub>3</sub> with cold pentane yielded a bright red solid (160 mg, 28%).  $\delta_H$ (600 MHz; CDCl<sub>3</sub>) 9.18 (m, 2H, Ar-*H*), 8.23 (dd,  $J$  = 1.6 & 8.0 Hz, 1H, Ar-*H*), 8.15 (dd,  $J$  = 1.5 & 8.4 Hz, 1H, Ar-*H*), 7.76 (s, 1H, Ar-*H*), 7.63 (dd,  $J$  = 4.2 & 8.0 Hz, 1H, Ar-*H*), 7.62 (d,  $J$  = 8.0 Hz, 2H, Ar-*H*), 7.56 (dd,  $J$  = 4.3 & 8.3 Hz, 1H, Ar-*H*), 7.43 (d,  $J$  = 8.2 Hz, 2H, Ar-*H*), 5.98 (s, 2H, pyr-*H*), 2.52 (s, 6H, CH<sub>3</sub>), 1.50 (s, 6H, CH<sub>3</sub>); <sup>13</sup>C NMR (CDCl<sub>3</sub>)  $\delta$  155.8, 150.6, 150.3, 146.5, 145.9, 142.8, 140.9, 139.7, 137.9, 136.0, 134.9, 134.0, 131.4, 130.7, 128.5, 128.0, 127.6, 126.9, 123.6, 123.0, 121.5, 14.7, 14.6 ppm; <sup>19</sup>F NMR CDCl<sub>3</sub>  $\delta$  -146.13 (d), -146.32 (d); HR MS (TOF MS ES<sup>+</sup>):  $m/z$  = 503.2239 Calcd for (C<sub>31</sub>H<sub>25</sub>BN<sub>4</sub>F<sub>2</sub> + H<sup>+</sup>) = 503.2219.

**1,3,5,7-tetramethyl-2,6-dibromo-5-phenanthroline-4,4'-difluoroboradiazaindacene (7)** (30 mg, 0.06 mmol) of (**5**) was added to anhydrous DCM (20 ml) with stirring. Added to this via a pressure equalizing dropping funnel was Br<sub>2</sub> (10  $\mu$ L, 0.18 mmol) in DCM (2.5 ml) over 30 min. The solution was stirred for an additional 2 h (TLC). The solvent was then removed *in vacuo* and the crude product crystallised from DCM:MeOH (90/10) with pentane. This resulted in a dark red solid (28 mg, 70%).  $\delta_H$ (600 MHz; DMSO-*d*<sub>6</sub>) 9.44 (dd,  $J$  = 1.4 & 4.7 Hz, 1H, Ar-*H*), 9.41 (dd,  $J$  = 1.4 & 5.0 Hz, 1H, Ar-*H*), 9.26 (d,  $J$  = 8.0 Hz, 1H, Ar-*H*), 8.74 (dd,  $J$  = 1.0 & 8.4 Hz, 1H, Ar-*H*), 8.55 (s, 1H, Ar-*H*), 8.36 (dd,  $J$  = 4.9 & 8.2 Hz, 1H, Ar-*H*), 8.29 (dd,  $J$  = 4.7 & 8.5 Hz, 1H, Ar-*H*), 7.92 (d,  $J$  = 8.2 Hz, 2H, Ar-*H*), 7.79 (d,  $J$  = 8.4 Hz, 2H, Ar-*H*), 2.60 (s, 6H, CH<sub>3</sub>), 1.59 (s, 6H, CH<sub>3</sub>); <sup>13</sup>C NMR (DMSO-*d*<sub>6</sub>)  $\delta$  153.4, 148.2, 147.2, 142.9, 142.1, 140.0, 138.8, 138.4, 138.2, 138.0, 136.9, 133.8, 131.0, 129.8, 129.0, 128.6, 128.3, 127.4, 126.3, 126.1, 111.4, 13.7, 13.5 ppm; <sup>19</sup>F NMR DMSO-*d*<sub>6</sub>  $\delta$  -143.3 (d), -143.4 (d); HR MS (TOF MS ES<sup>+</sup>):  $m/z$  = 661.0385 Calcd for (C<sub>31</sub>H<sub>24</sub>BN<sub>4</sub>F<sub>2</sub><sup>79</sup>Br<sup>81</sup>Br) = 661.0408.

**Ru(bpy-Ar-COOH)<sub>2</sub>Cl<sub>2</sub> (8)** RuCl<sub>3</sub>·3H<sub>2</sub>O (151 mg, 0.56 mmol), was added to degassed DMF under a steady stream of N<sub>2</sub> and heated with stirring to 100 °C. Compound (**6**) (151 mg, 0.56 mmol) was added and the reaction mixture was allowed to stir for 10 min. The temperature was then raised to 140 °C and LiCl (5 equiv) was added and stirred for another 10 min. The remaining (**6**) (151 mg, 0.56 mmol) was added and reaction allowed to proceed for 7 h. The DMF was then removed and

acetone:H<sub>2</sub>O (1/3) was added to induce precipitation and the mixture was filtered and washed with acetone to yield a purple solid (130 mg, 32%). <sup>1</sup>H NMR pattern shows a broad signal pattern integrating for 22 Ar-H. Fac and Mer isomers remained unresolved as separated isomers not needed.

**Ru(bpy-Ar-COOH)<sub>2</sub>-phen-Ar-BODIPY-Br<sub>2</sub> (9)** Compound **(7)** (100 mg, 0.14 mmol) was added to a solution of EtOH:H<sub>2</sub>O 3/1 (20 ml) and heated to reflux. Compound **(8)** (91 mg, 0.14 mmol) was then added and the solution left at reflux for 12 h. The reaction mixture was then concentrated to half volume and a saturated LiClO<sub>4</sub> solution was added resulting in a red precipitate which was filtered and purified on silica gel CHCl<sub>3</sub>:MeOH:CH<sub>3</sub>COOH 76/20/4 to yield a red solid (65 mg, 33%).  $\delta_{\text{H}}$  (600 MHz; DMSO-d<sub>6</sub>) 9.28 (m, 4H, Ar-H), 8.90 (d, *J* = 8.34 Hz, 1H, Ar-H), 8.56 (m, 2H, Ar-H), 8.28 (m, 5H, Ar-H), 8.09 (m, 9H, Ar-H), 7.96 (m, 7H, Ar-H), 7.74 (d, *J* = 7.9 Hz, 2H, Ar-H), 7.66 (m, 3H, Ar-H), 7.42 (m, 1H, Ar-H), 2.56 (s, 6H, CH<sub>3</sub>), 1.53 (s, 6H, CH<sub>3</sub>); <sup>13</sup>C NMR (DMSO-d<sub>6</sub>)  $\delta$  166.7, 157.5, 157.4, 157.3, 156.8, 156.6, 153.4, 152.5, 152.4, 151.8, 151.7, 147.2, 147.0, 146.6, 146.5, 142.2, 140.4, 139.2, 139.0, 138.8, 138.0, 137.0, 134.9, 134.3, 134.1, 133.8, 132.2, 131.2, 130.0, 129.8, 128.6, 128.4, 128.1, 128.0, 127.9, 127.8, 127.6, 127.5, 126.8, 124.9, 124.8, 121.8, 121.7, 111.4, 13.6, 13.5 ppm; <sup>19</sup>F NMR DMSO-d<sub>6</sub>  $\delta$  -143.2 (d), -143.4 (d); HR MS (TOF MS ES<sup>+</sup>): *m/z* = 657.0539 Calcd for (C<sub>65</sub>H<sub>47</sub>BBBr<sub>2</sub>N<sub>8</sub>O<sub>4</sub>F<sub>2</sub>Ru + 2H<sup>+</sup> - 2ClO<sub>4</sub> / 2) = 657.0674, *m/z* = 656.0592 calcd for (C<sub>65</sub>H<sub>47</sub>BBBr<sub>2</sub>N<sub>8</sub>O<sub>4</sub>F<sub>2</sub>Ru / 2) = 656.0596. Elemental Analysis: calculated (%) for C<sub>65</sub>H<sub>47</sub>N<sub>8</sub>O<sub>16</sub>BBBr<sub>2</sub>F<sub>2</sub>NaCl<sub>3</sub>Ru – C; 47.75, H; 2.90, N; 6.85. Found (%) C; 47.74, H; 2.88, N; 6.81.

### Real-time confocal luminescent imaging

CHO cells were seeded at 2.5 x 10<sup>5</sup> cells in 2 mL media on 35 mm glass-bottom culture dishes. Cells were grown for 24 h at 37 °C at 5 % CO<sub>2</sub>. The growth media was removed and 15 uM of the Ruthenium-BODIPY complex in phenol red-free media was added and left to incubate for 24 h at 37 °C at 5 % CO<sub>2</sub> in the dark. The dye/media solution was removed and cells were washed with PBS supplemented with 1.1 mM MgCl<sub>2</sub> and 0.9 mM CaCl<sub>2</sub>. Cells were imaged using a Zeiss LSM 510 Meta confocal microscope using a 63x oil immersion objective lens. A 458 nm argon ion laser was used to excite the complex. The BODIPY emission was collected using a band-pass 505-550 nm filter. The ruthenium emission was collected using a long pass 560 nm filter. The excitation/λ scan was carried out using the 458 nm argon ion laser and emission was collected between 497 and 754 nm with a step size of 10 nm.

## Cell Viability Assay

CHO cells were seeded in a 96-well plate in 100  $\mu\text{L}$  of media at  $1 \times 10^4$  cells per well for 24 h at 37°C with 5%  $\text{CO}_2$ . Ruthenium-BODIPY was added to give final concentrations of 150, 100, 50, 15, 1, 0.1  $\mu\text{M}$ . Cells were incubated for 24 h at 37°C at 5%  $\text{CO}_2$  in the dark. 10  $\mu\text{L}$  of Resazurin (Alamar Blue) reagent was added to each well, and incubated for a further 7 h in the dark at 37°C. The resazurin was converted to resorufin in viable cells and its absorbance was measured at 570 nm, with background measured at 600 nm using a Tecan 96-well plate reader.

## Excitation Spectra

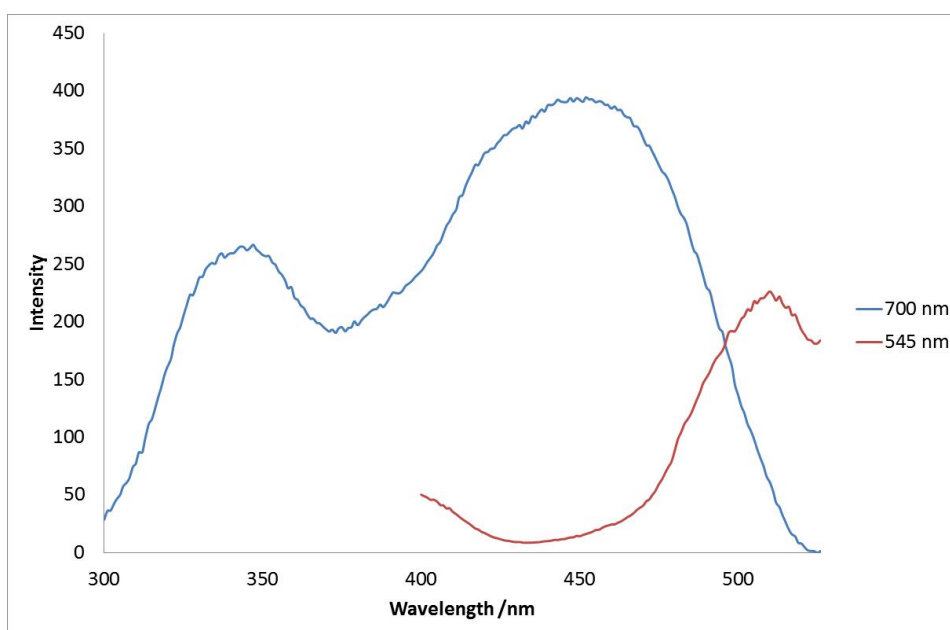

S1. Excitation spectra for the dyad (9) 50  $\mu\text{mol}$  in methanol, monitoring for emission centred at 700 nm and 545 nm.

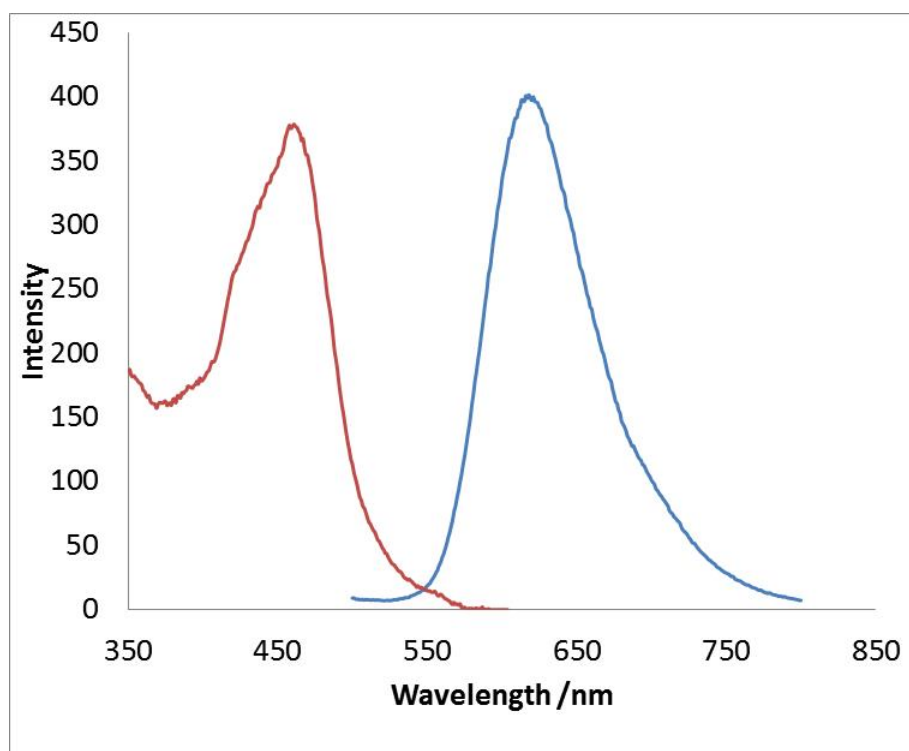

S2. Excitation spectrum (red) and emission spectrum (blue) for dyad (9) 50  $\mu\text{mol}$  in aqueous PBS, excitation was collected for emission at 630 nm.

## Emission Lifetime Data;

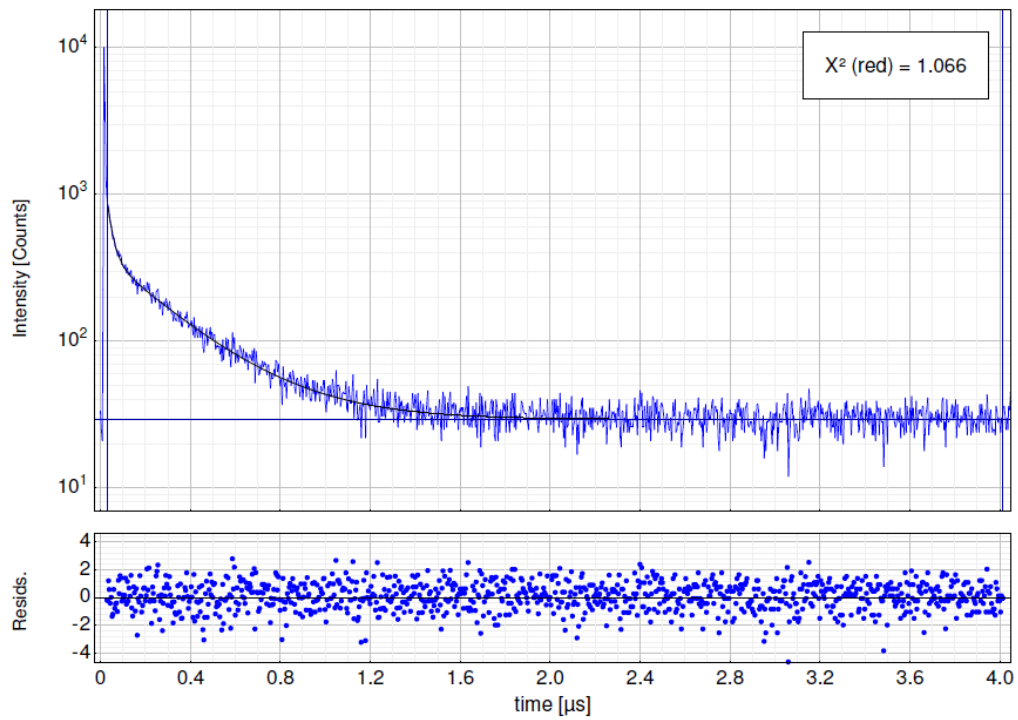

$$I(t) = \sum_{i=1}^n A_i e^{-\frac{t}{\tau_i}}$$

| Parameter                  | Value   | Conf. Lower | Conf. Upper | Conf. Estimation |
|----------------------------|---------|-------------|-------------|------------------|
| $A_1$ [Cnts]               | 335.0   | -12.7       | +12.7       | Fitting          |
| $\tau_1$ [ $\mu\text{s}$ ] | 0.3063  | -0.0107     | +0.0107     | Fitting          |
| $A_2$ [Cnts]               | 487.4   | -70.2       | +70.2       | Fitting          |
| $\tau_2$ [ $\mu\text{s}$ ] | 0.02471 | -0.00443    | +0.00443    | Fitting          |
| Bkgr. Dec [Cnts]           | 29.29   | -1.01       | +1.01       | Fitting          |

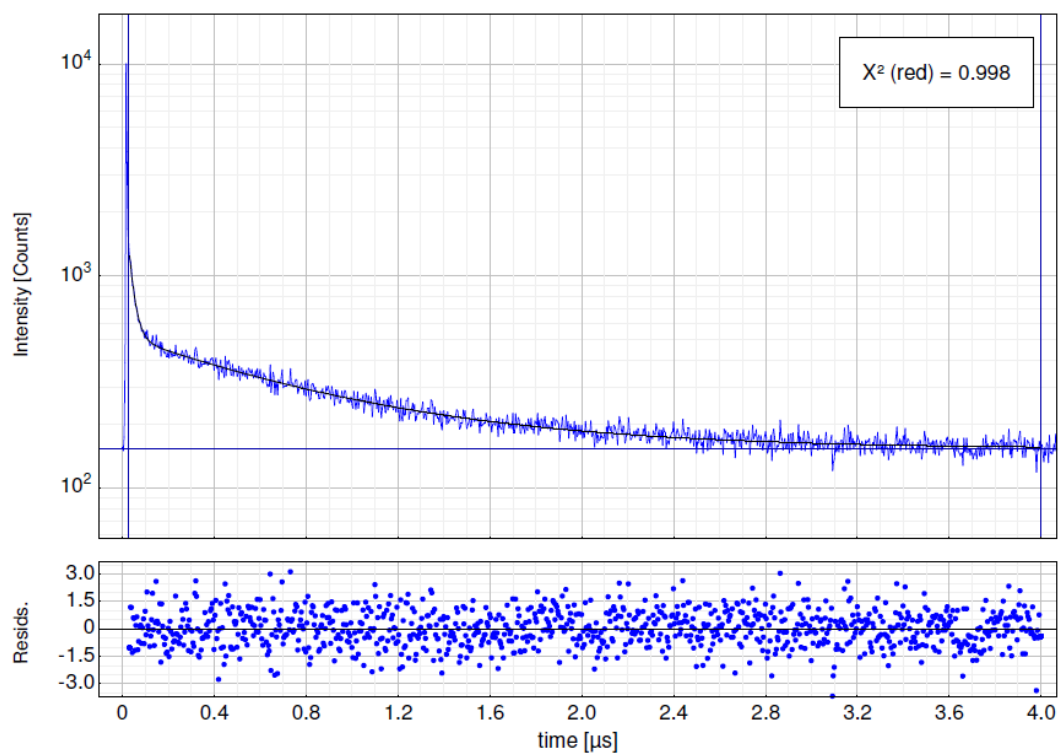

$$I(t) = \sum_{i=1}^n A_i e^{-\frac{t}{\tau_i}}$$

| Parameter           | Value   | Conf. Lower | Conf. Upper | Conf. Estimation |
|---------------------|---------|-------------|-------------|------------------|
| $A_1$ [Cnts]        | 355.04  | -9.57       | +9.57       | Fitting          |
| $\tau_1$ [ $\mu$ s] | 0.8250  | -0.0252     | +0.0252     | Fitting          |
| $A_2$ [Cnts]        | 730.5   | -83.7       | +83.7       | Fitting          |
| $\tau_2$ [ $\mu$ s] | 0.02366 | -0.00345    | +0.00345    | Fitting          |
| Bkgr. Dec [Cnts]    | 153.18  | -2.26       | +2.26       | Fitting          |

S3. Time correlated Single Photon counting trace for Dyad (9)  $3 \times 10^{-6}$  M in (a) aerated methanol (b) de-aerated methanol (following 30 minutes bubbling with  $N_2$  gas)



#### Excitation/ $\lambda$ scan

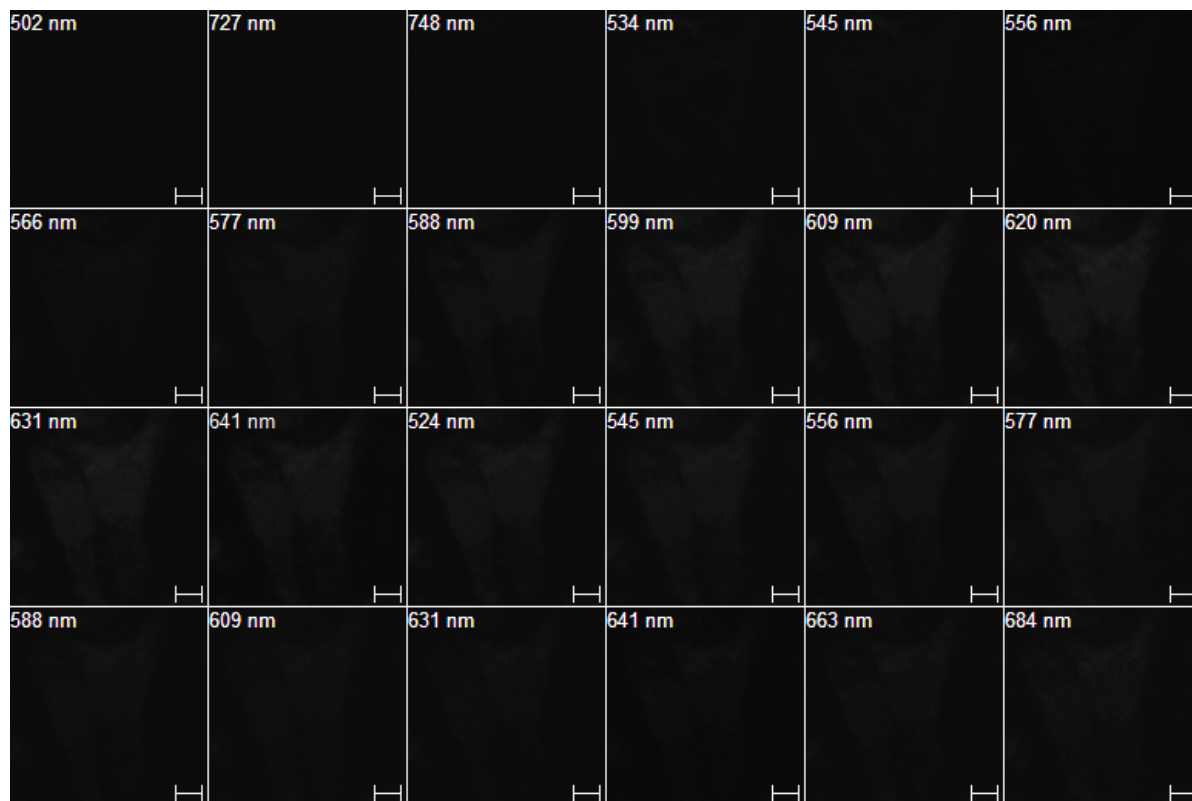

S4. Excitation scan of Ruthenium-BODIPY complex in CHO cells (15  $\mu$ M) demonstrating no BODIPY emission at 529-550 nm when excited with a 458 nm argon laser. Scale bar = 10  $\mu$ M

## Cell Viability Studies

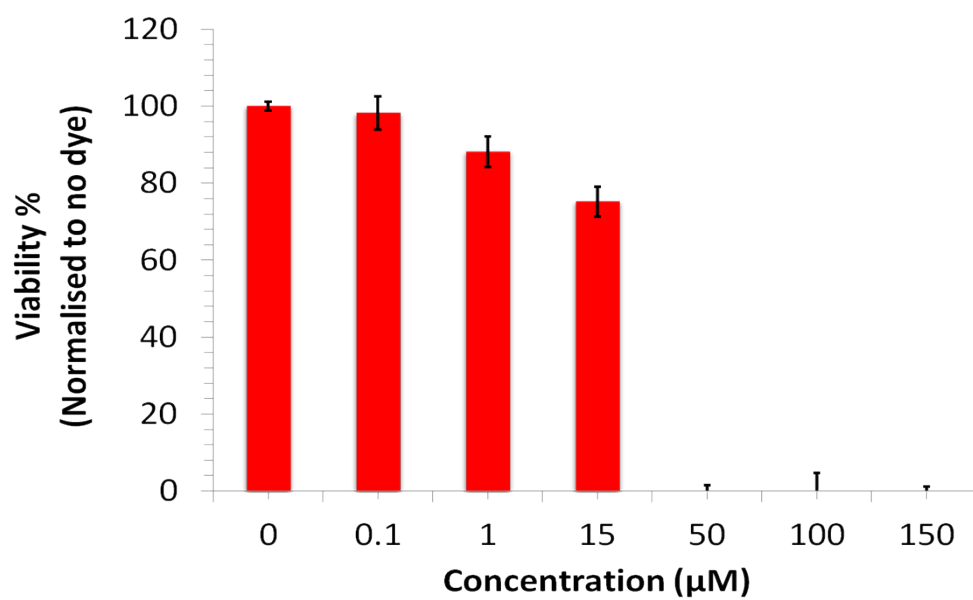

S5. Viability studies for the ruthenium-BODIPY dyad; carried out in CHO cells in the dark using the Resazurin (Alamar blue) reagent. (n=3)

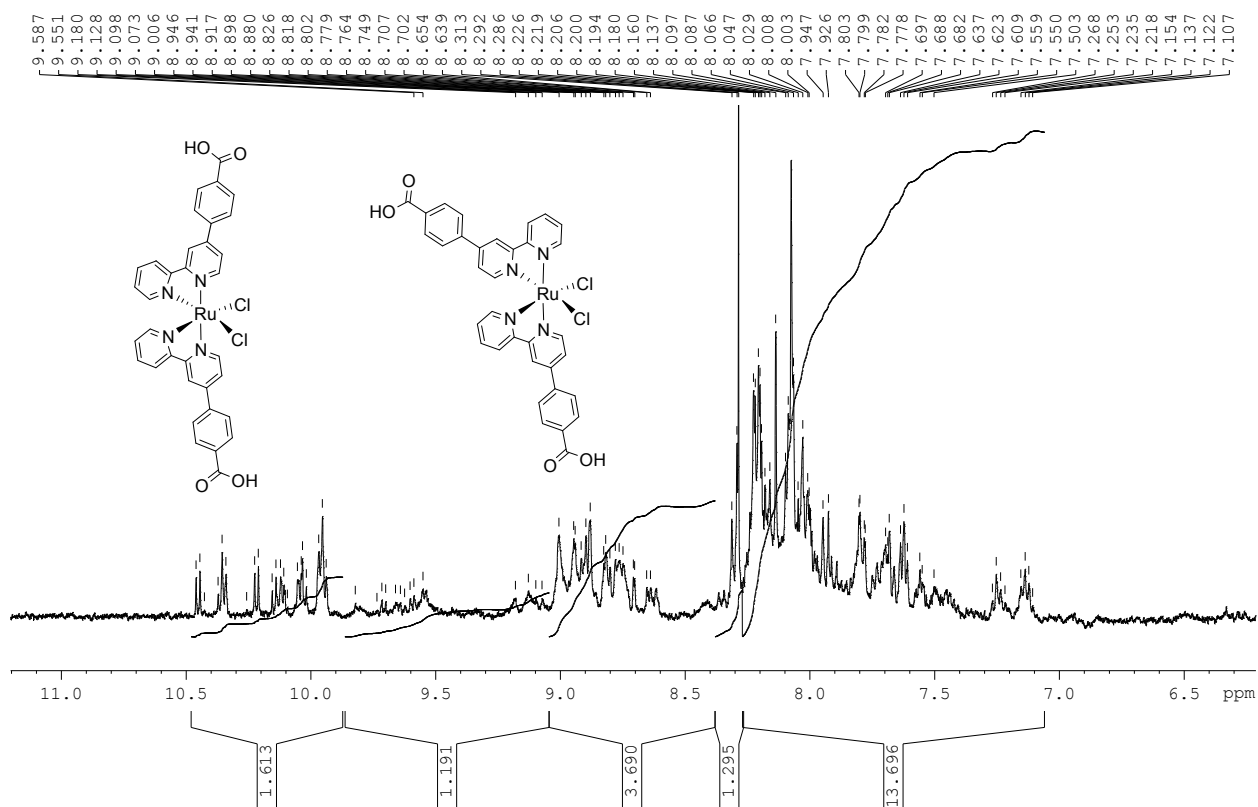

S6.  $^1\text{H}$  NMR of (8) in  $\text{DMSO-d}_6$  reveal a mixture of fac and mer isomers which did not separate on HPLC.

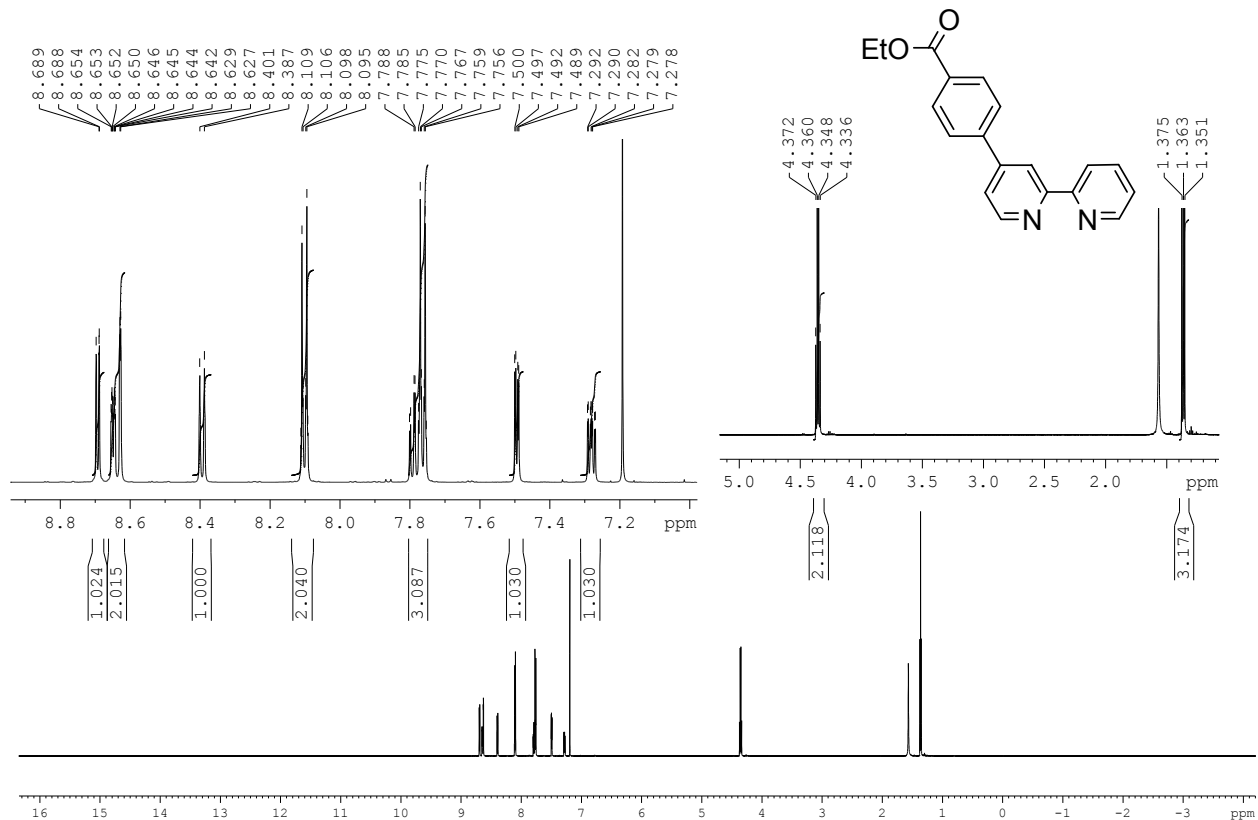

S7.  $^1\text{H}$  NMR spectra of (4) in  $\text{CDCl}_3$ .

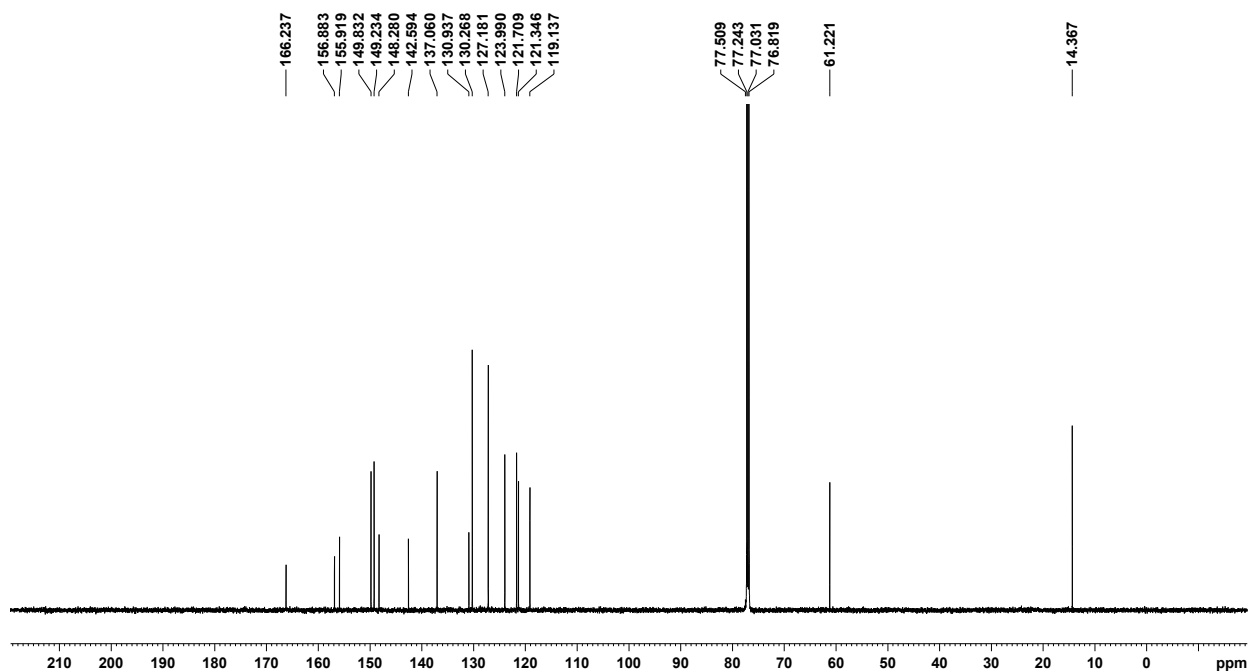

S8.  $^{13}\text{C}$  NMR spectra of (4) in  $\text{CDCl}_3$ .

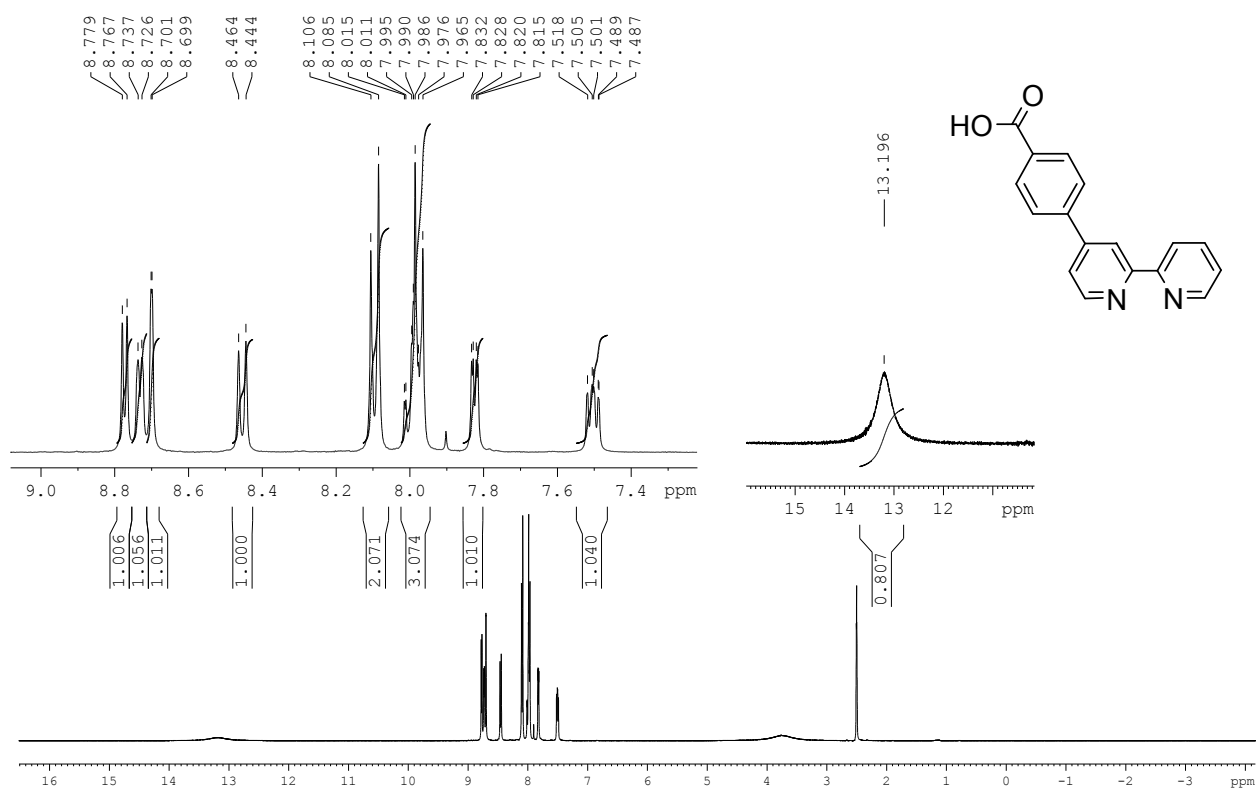

S9.  $^1\text{H}$  NMR spectra of (5) in  $\text{DMSO-d}_6$ .

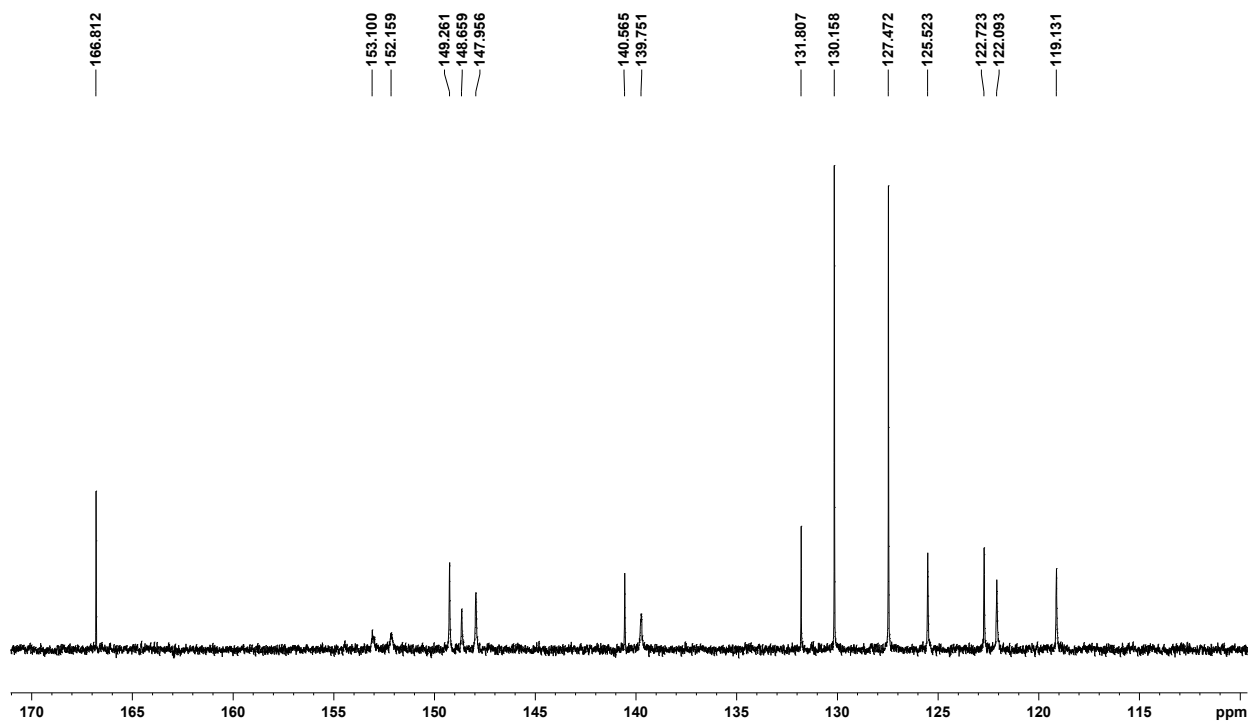

S10.  $^{13}\text{C}$  NMR spectra of (5) in  $\text{DMSO-d}_6$ .

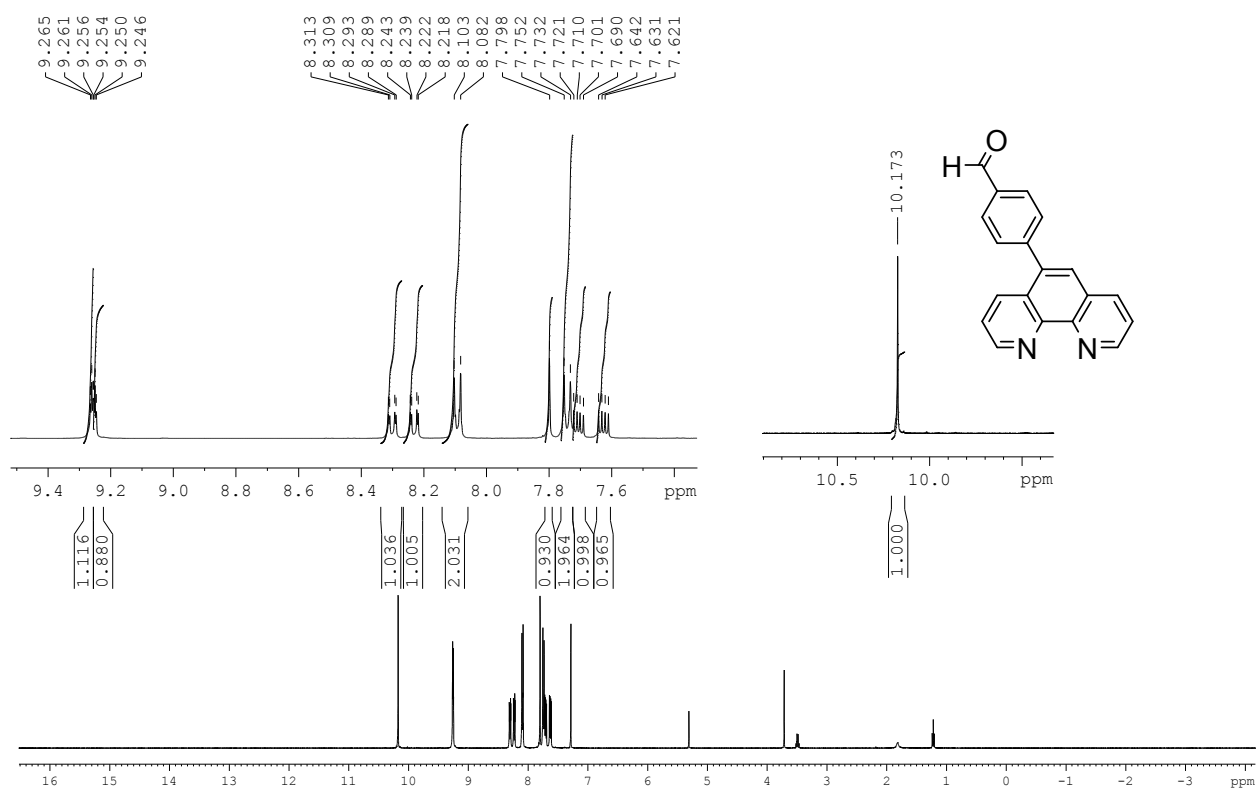

S11.  $^1\text{H}$  NMR spectra of (3) in  $\text{CDCl}_3$ , inset aromatic region and  $\text{CHO}$ .

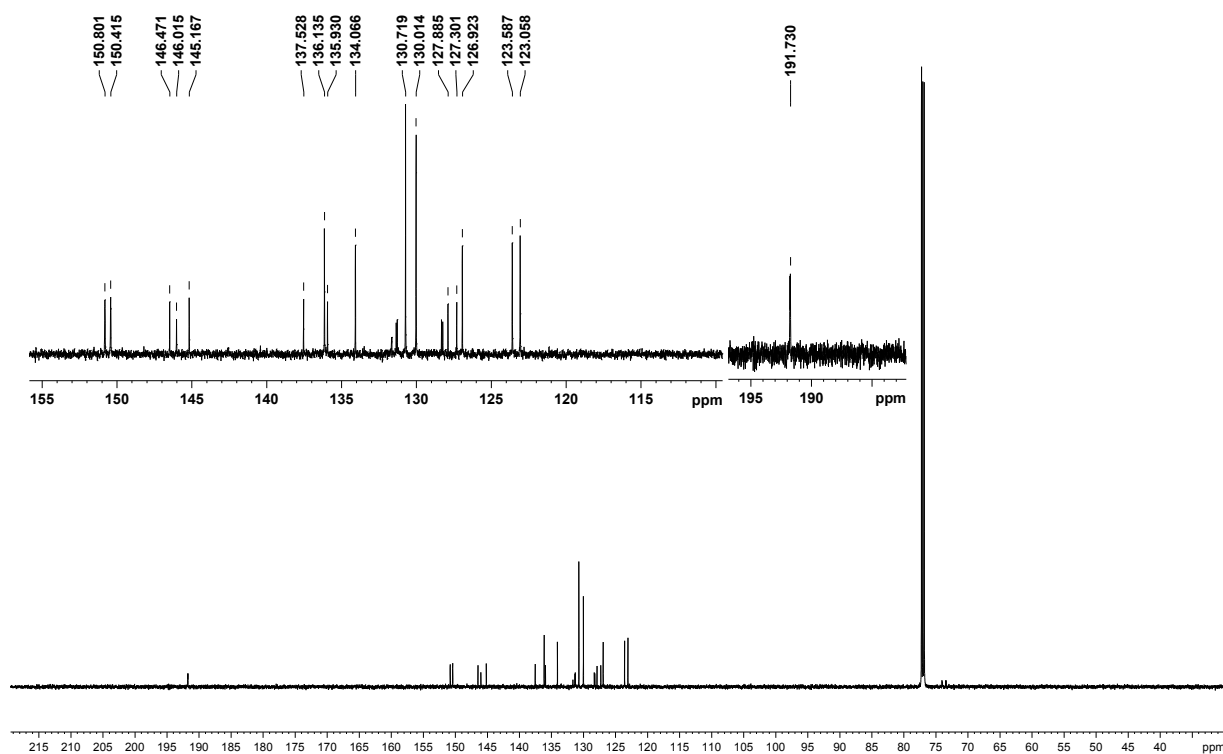

S12. <sup>13</sup>C NMR spectra of (3) in CDCl<sub>3</sub>, inset aromatic region and CHO.

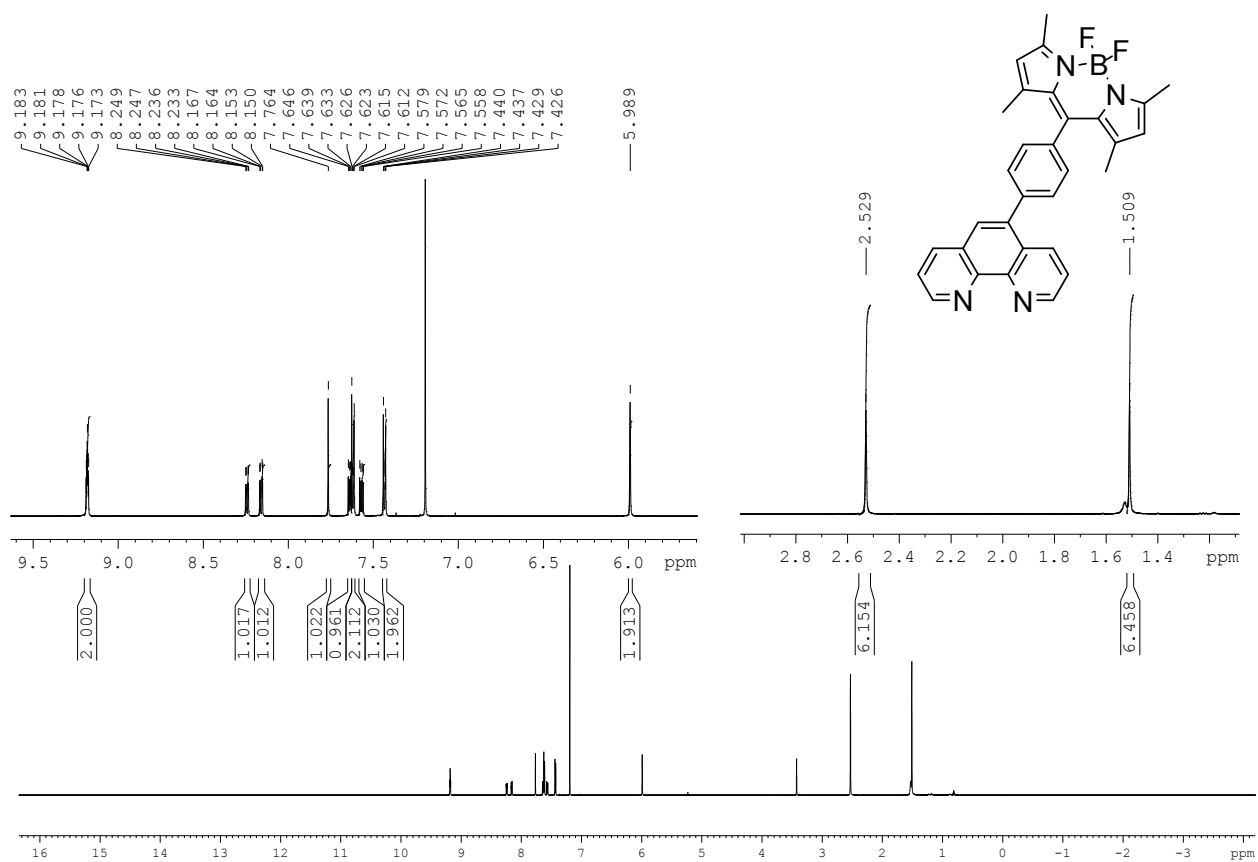

S13. <sup>1</sup>H NMR spectra of (5) in CDCl<sub>3</sub>, inset aromatic region and CH<sub>3</sub>.

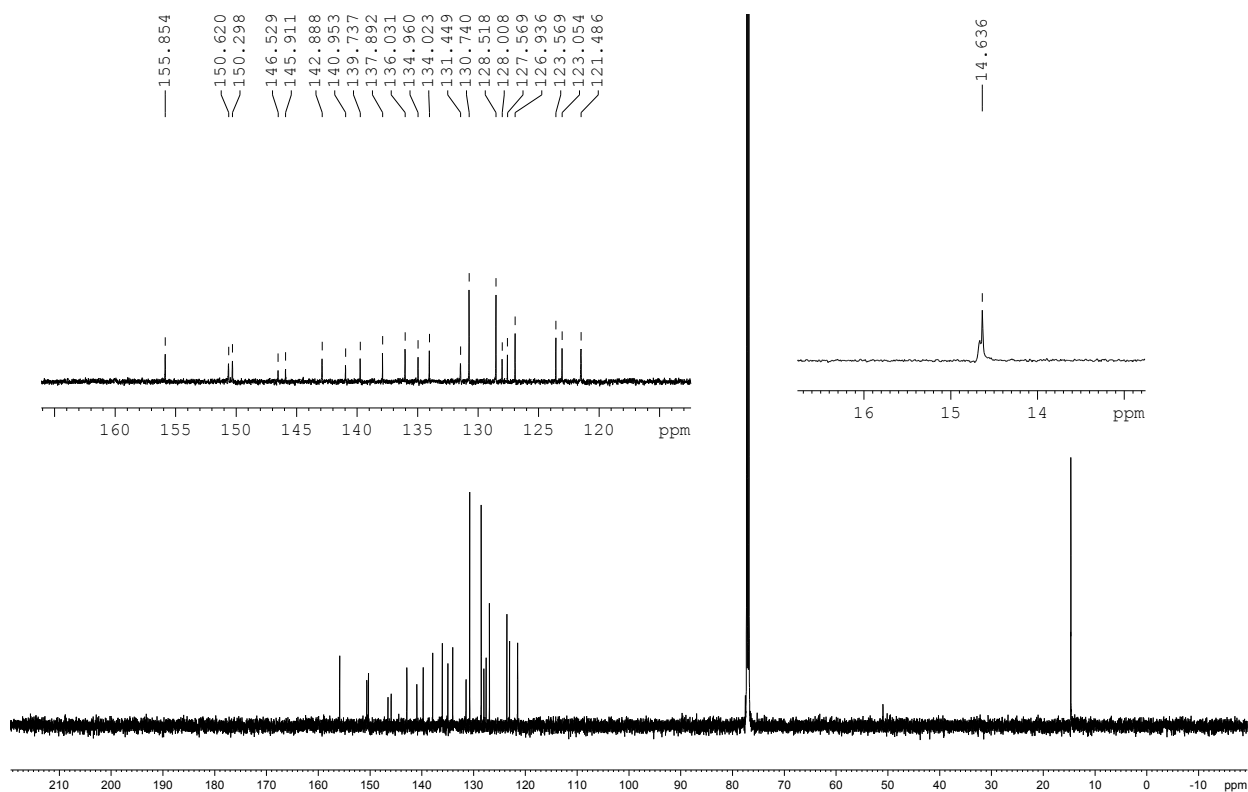

S14.  $^1\text{H}$  NMR spectra of (5) in  $\text{CDCl}_3$ , inset aromatic region and  $\text{CH}_3$ .

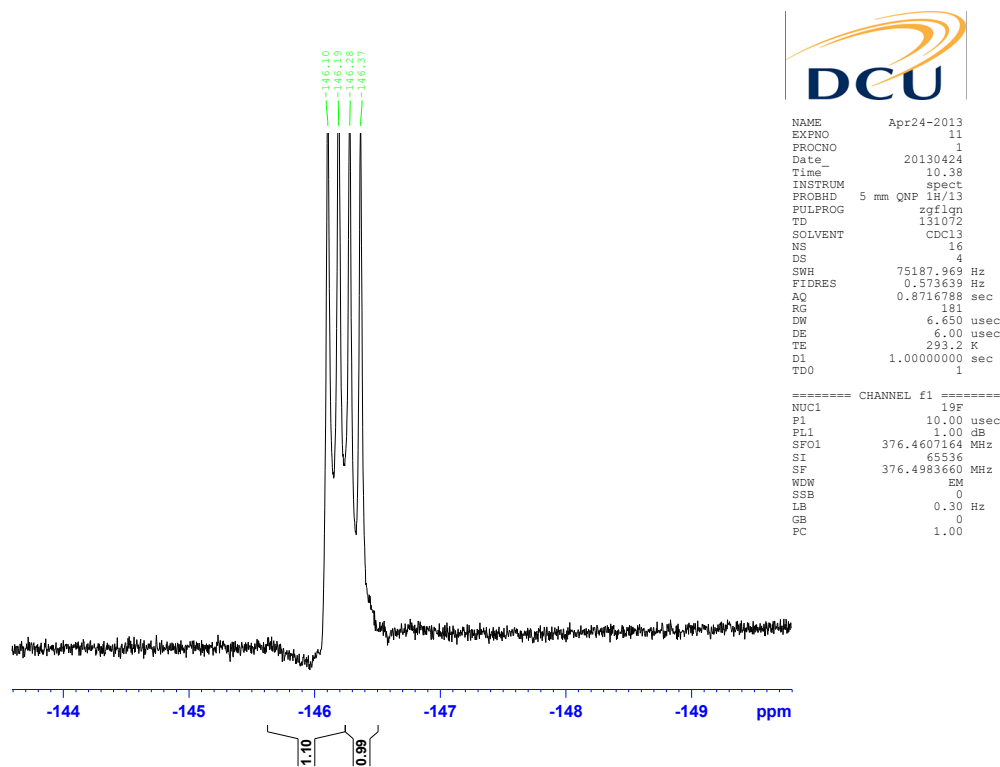

S15.  $^{19}\text{F}$  NMR spectra of (5) in  $\text{CDCl}_3$ .

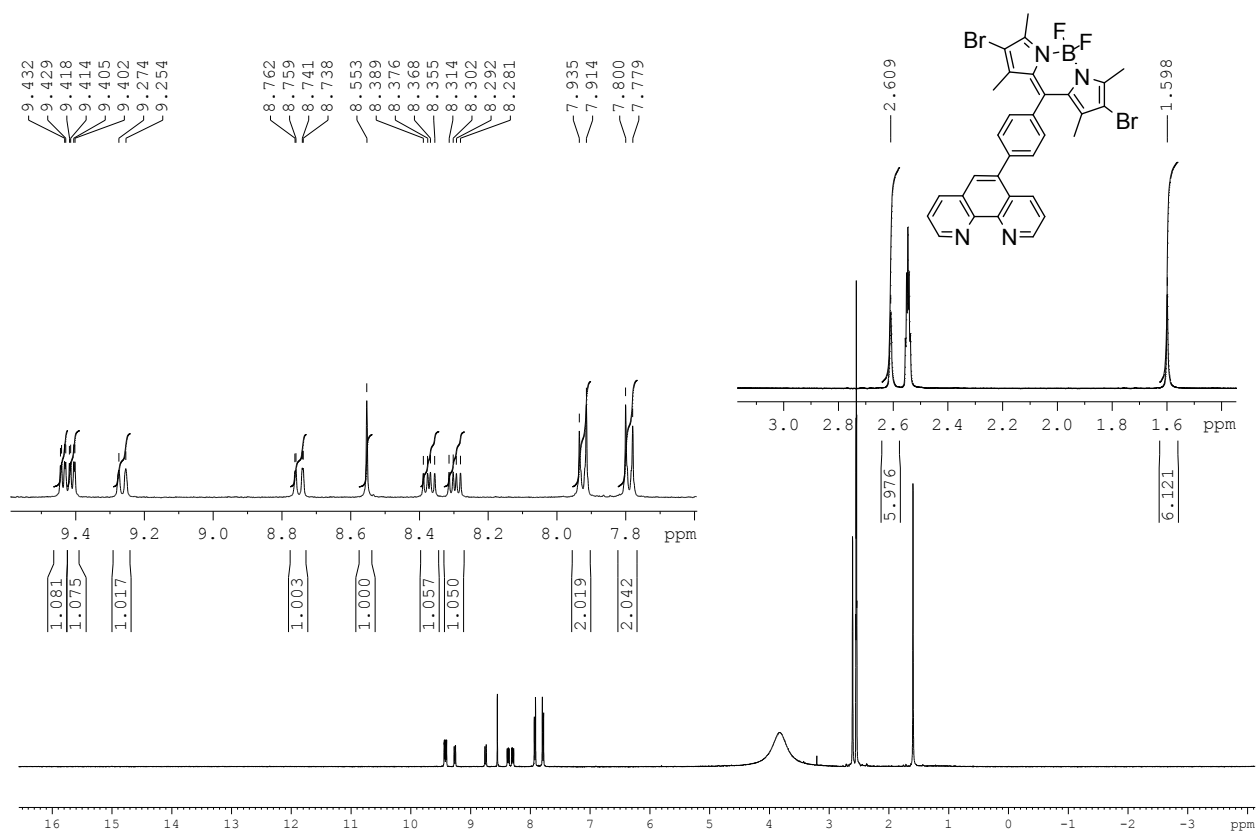

S16.  $^1\text{H}$  NMR spectra of (7) in  $\text{DMSO}-d_6$ , inset aromatic region and  $\text{CH}_3$ .



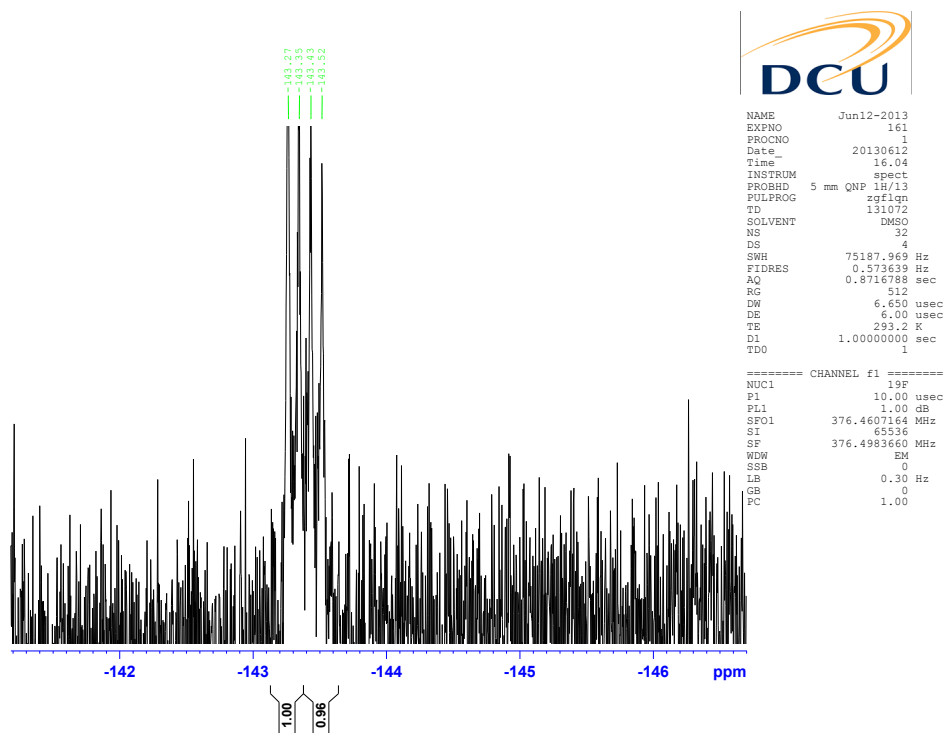

S17.  $^{19}\text{F}$  NMR spectra of (7) in  $\text{DMSO-d}_6$ .

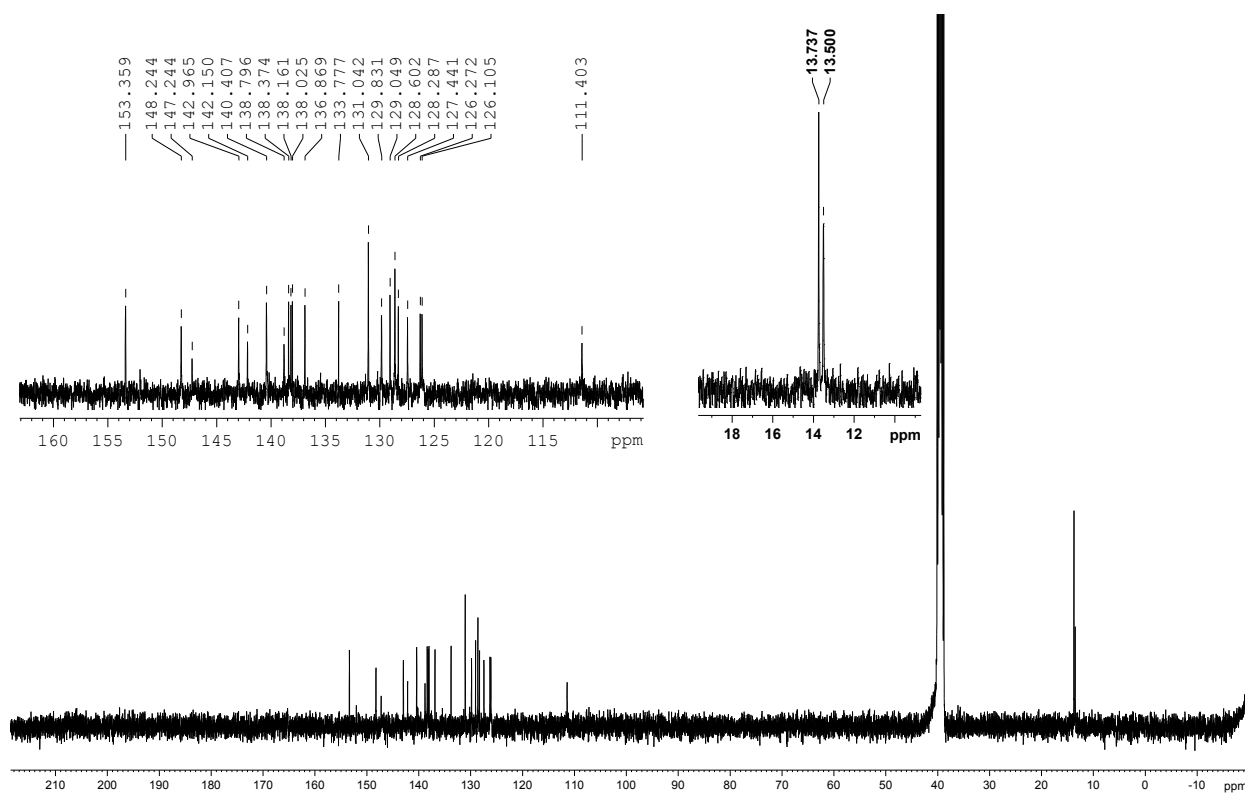

S17.  $^{13}\text{C}$  NMR spectra of (7) in  $\text{DMSO-d}_6$ , inset aromatic region and  $\text{CH}_3$ .

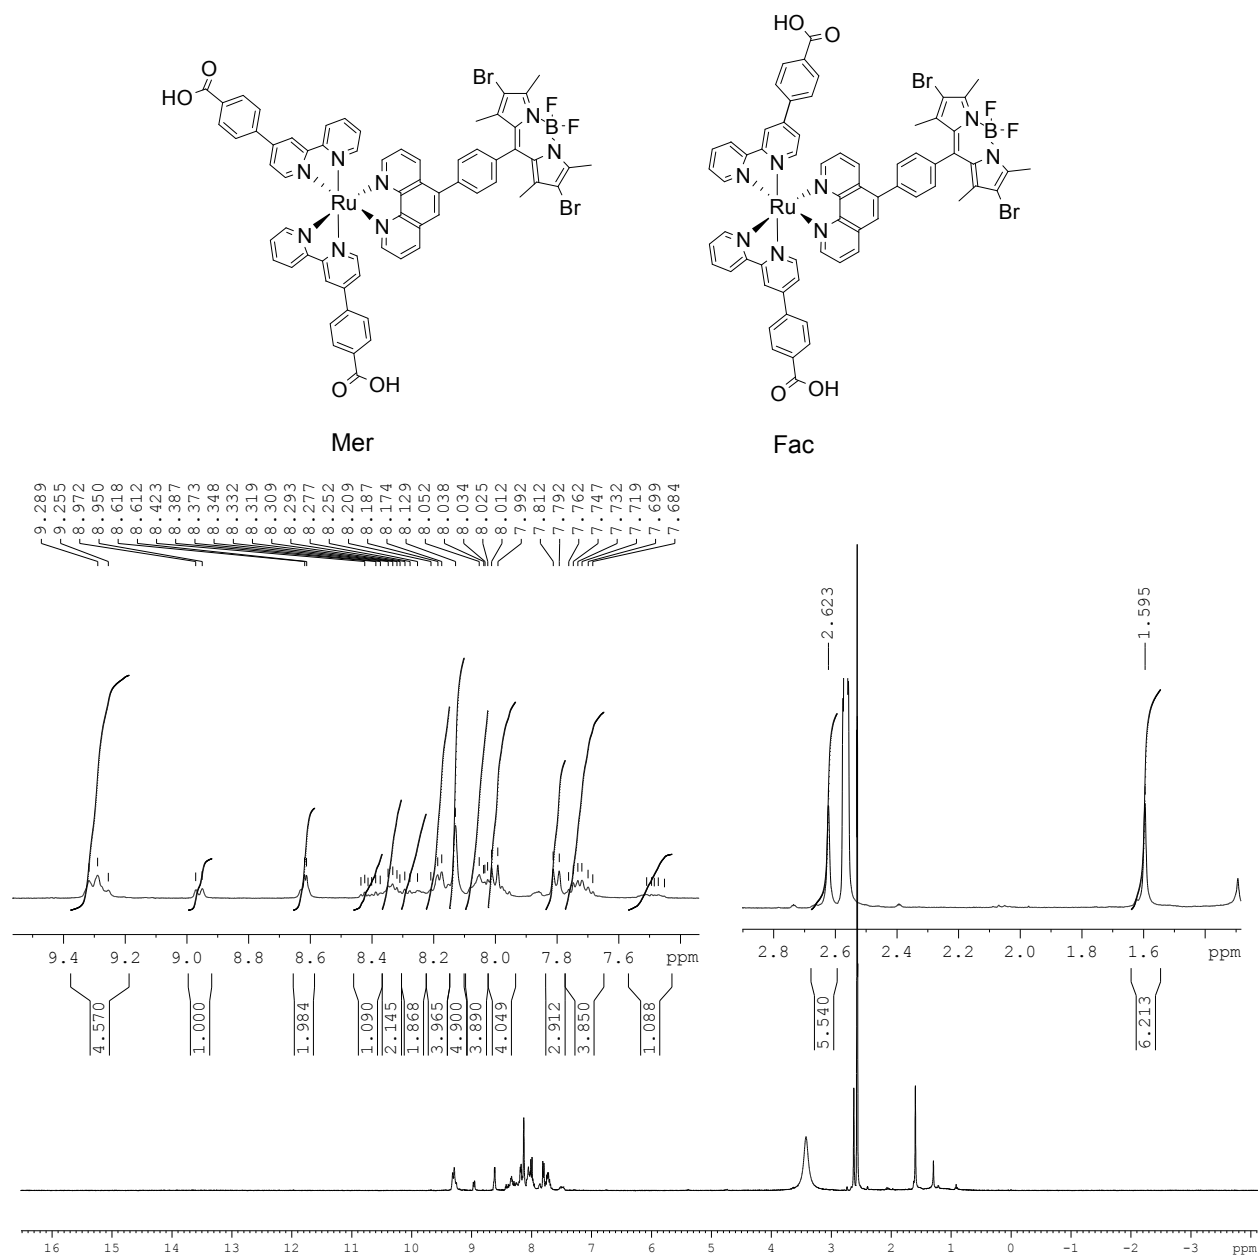

S18.  $^1\text{H}$  NMR spectra of dyad (9) in  $\text{DMSO-d}_6$ , the complex is prepared and purified as a mixture of unresolved fac and mer isomers.

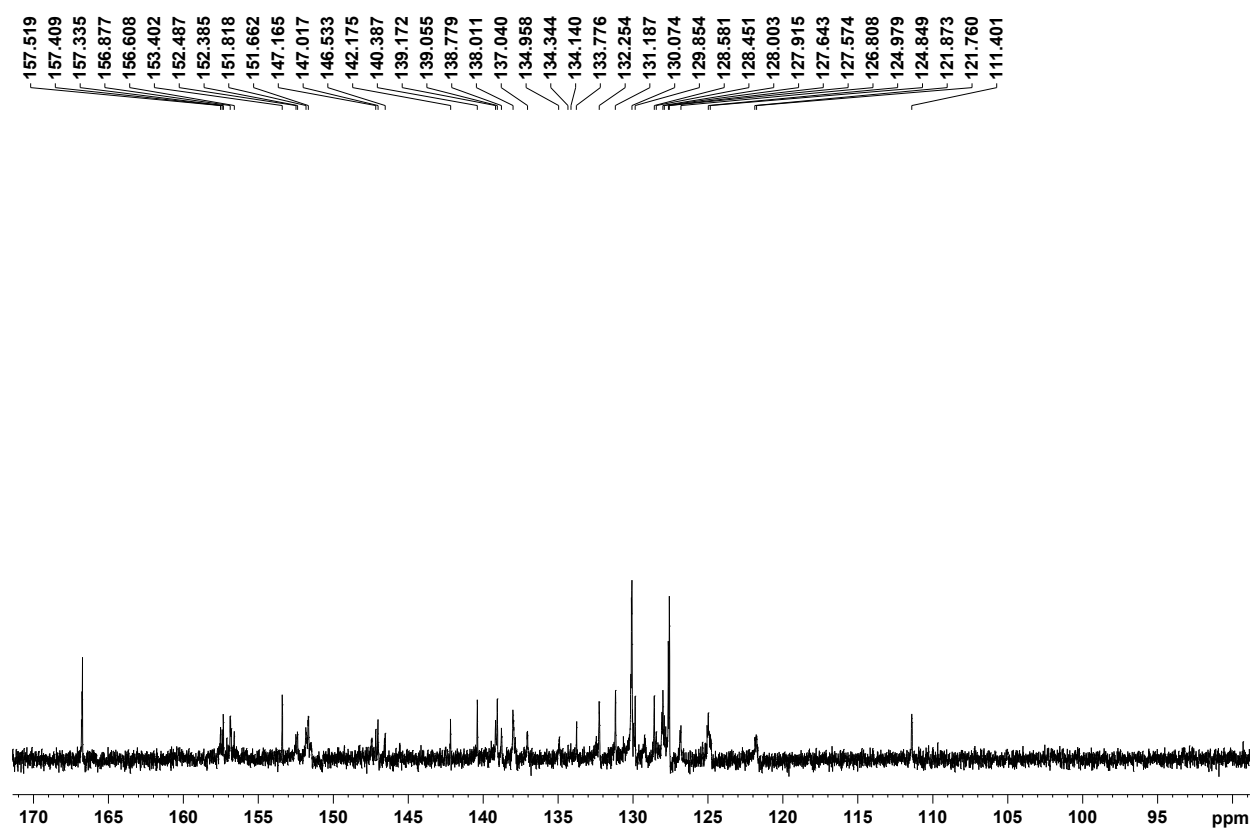

S19. <sup>13</sup>C NMR spectra of dyad (9) in DMSO-d<sub>6</sub>.

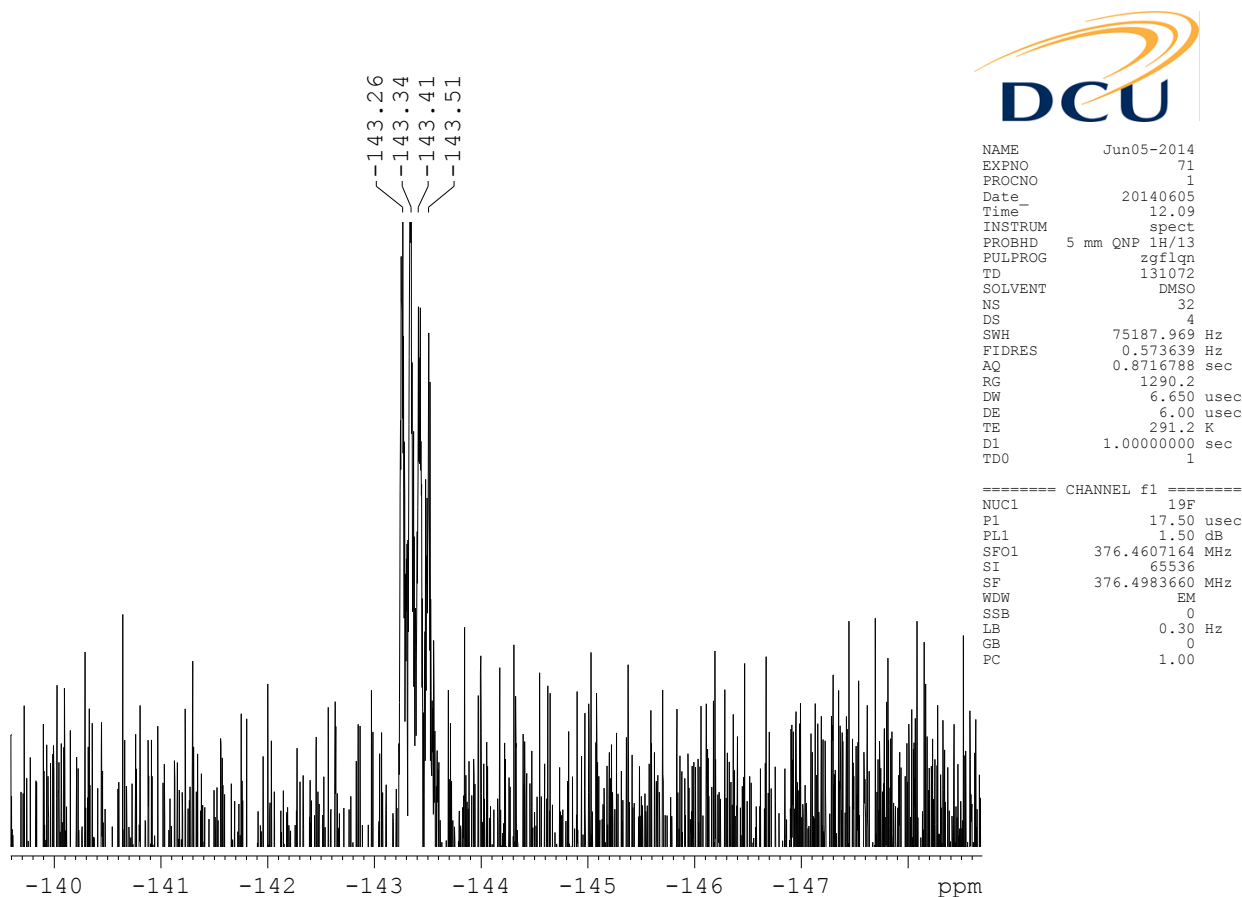

S20.  $^{19}\text{F}$  NMR spectra of dyad (9) in  $\text{DMSO-d}_6$ .

### Single Mass Analysis

Tolerance = 20.0 PPM / DBE: min = -1.5, max = 1000.0

Isotope cluster parameters: Separation = 1.0 Abundance = 1.0%

Monoisotopic Mass, Odd and Even Electron Ions

11 formula(e) evaluated with 1 results within limits (all results (up to 1000) for each mass)

DCU\_AM\_TK\_AM026 20 (0.648) AM (Cen,4, 80.00, Ar,5000.0,556.28,0.70,LS 10); Sm (Mn, 2x7.00); Sb (1,15.00 )

1: TOF MS ES+

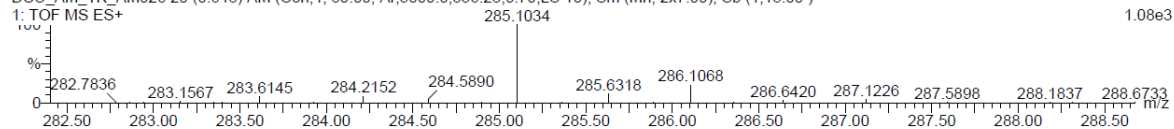

Minimum: -1.5  
Maximum: 200.0 20.0 1000.0

| Mass     | Calc. Mass | mDa | PPM | DBE  | Score | Formula      |
|----------|------------|-----|-----|------|-------|--------------|
| 285.1034 | 285.1028   | 0.6 | 2.1 | 14.5 | 1     | C19 H13 N2 O |

S21. HRMS of (3).

### Single Mass Analysis

Tolerance = 50.0 PPM / DBE: min = -1.5, max = 1000.0

Isotope cluster parameters: Separation = 1.0 Abundance = 1.0%

Monoisotopic Mass, Odd and Even Electron Ions

2 formula(e) evaluated with 1 results within limits (all results (up to 1000) for each mass)

DCU\_TK\_AM-CB2 36 (1.156) AM (Cen,4, 80.00, Ar,5000.0,556.28,0.70,LS 10); Sm (Mn, 2x11.00); Sb (1,15.00 )

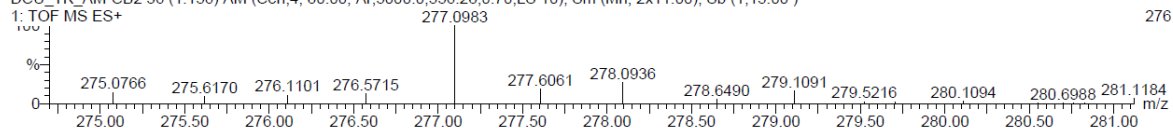

Minimum: -1.5  
Maximum: 200.0 50.0 1000.0

| Mass     | Calc. Mass | mDa | PPM | DBE  | Score | Formula       |
|----------|------------|-----|-----|------|-------|---------------|
| 277.0983 | 277.0977   | 0.6 | 2.2 | 12.5 | 1     | C17 H13 N2 O2 |

### S22. HRMS of (6).

### Single Mass Analysis

Tolerance = 100.0 PPM / DBE: min = -1.5, max = 1000.0

Isotope cluster parameters: Separation = 1.0 Abundance = 1.0%

Monoisotopic Mass, Odd and Even Electron Ions

1 formula(e) evaluated with 1 results within limits (all results (up to 1000) for each mass)

DCU\_TK\_AM-CB1-cone 30 44 (1.422) AM (Cen,4, 80.00, Ar,5000.0,556.28,0.70,LS 10); Sm (Mn, 2x11.00); Sb (1,15.00 )

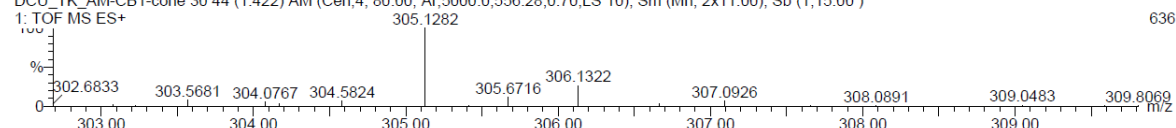

Minimum: -1.5  
Maximum: 200.0 100.0 1000.0

| Mass     | Calc. Mass | mDa  | PPM  | DBE  | Score | Formula       |
|----------|------------|------|------|------|-------|---------------|
| 305.1282 | 305.1290   | -0.8 | -2.6 | 12.5 | 1     | C19 H17 N2 O2 |

### S23. HRMS of (4).

### Single Mass Analysis

Tolerance = 20.0 PPM / DBE: min = -1.5, max = 1000.0

Isotope cluster parameters: Separation = 1.0 Abundance = 1.0%

Monoisotopic Mass, Odd and Even Electron Ions

4 formula(e) evaluated with 1 results within limits (all results (up to 1000) for each mass)

DCU\_AM\_TK\_AM028 26 (0.841) AM (Cen,4, 80.00, Ar,5000.0,556.28,0.70,LS 10); Sm (Mn, 2x7.00); Sb (1,15.00 )

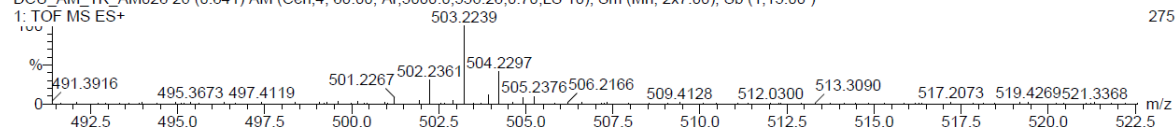

Minimum: -1.5  
Maximum: 200.0 20.0 1000.0

| Mass     | Calc. Mass | mDa | PPM | DBE  | Score | Formula         |
|----------|------------|-----|-----|------|-------|-----------------|
| 503.2239 | 503.2219   | 2.0 | 4.1 | 20.5 | 1     | C31 H26 B N4 F2 |

### S24. HRMS of (5).

### Single Mass Analysis

Tolerance = 100.0 PPM / DBE: min = -1.5, max = 1000.0

Isotope cluster parameters: Separation = 1.0 Abundance = 1.0%

Monoisotopic Mass, Odd and Even Electron Ions

2 formula(e) evaluated with 1 results within limits (all results (up to 1000) for each mass)

DCU\_TK\_AM-121-cone 30 27 (0.866) AM (Cen,4, 80.00, Ar,5000.0,556.28,0.70,LS 10); Sm (Mn, 2x11.00); Sb (1,15.00); Cm (24:28)

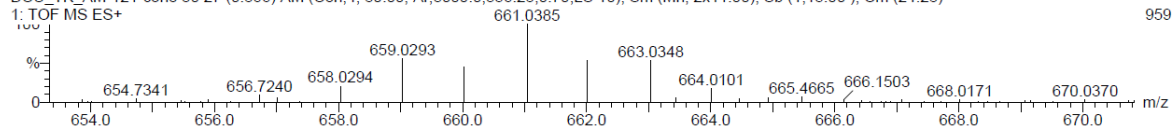

Minimum: -1.5  
Maximum: 200.0 100.0 1000.0

| Mass     | Calc. Mass | mDa  | PPM  | DBE  | Score | Formula                   |
|----------|------------|------|------|------|-------|---------------------------|
| 661.0385 | 661.0408   | -2.3 | -3.5 | 20.5 | 1     | C31 H24 B N4 F2 79Br 81Br |

S25. HRMS of (7).

### Single Mass Analysis

Tolerance = 10.0 PPM / DBE: min = -1.5, max = 1000.0

Isotope cluster parameters: Separation = 1.0 Abundance = 1.0%

Monoisotopic Mass, Odd and Even Electron Ions

2 formula(e) evaluated with 0 results within limits (all results (up to 1000) for each mass)

DCU\_TK\_AM-125-cone 30 26 (0.841) AM (Cen,4, 80.00, Ar,5000.0,556.28,0.70,LS 10); Sm (Mn, 2x11.00); Sb (1,15.00); Cm (22:31)

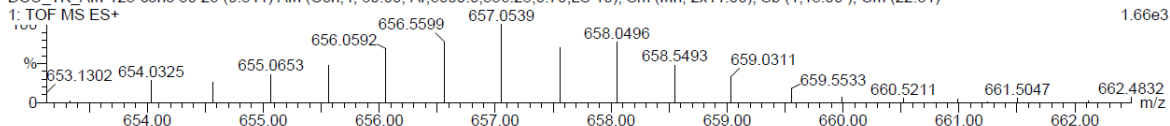

Minimum: -1.5  
Maximum: 200.0 10.0 1000.0

| Mass     | Calc. Mass | mDa | PPM | DBE | Score | Formula |
|----------|------------|-----|-----|-----|-------|---------|
| 656.0592 | ---        |     |     |     |       |         |

S26. HRMS of dyad (9).

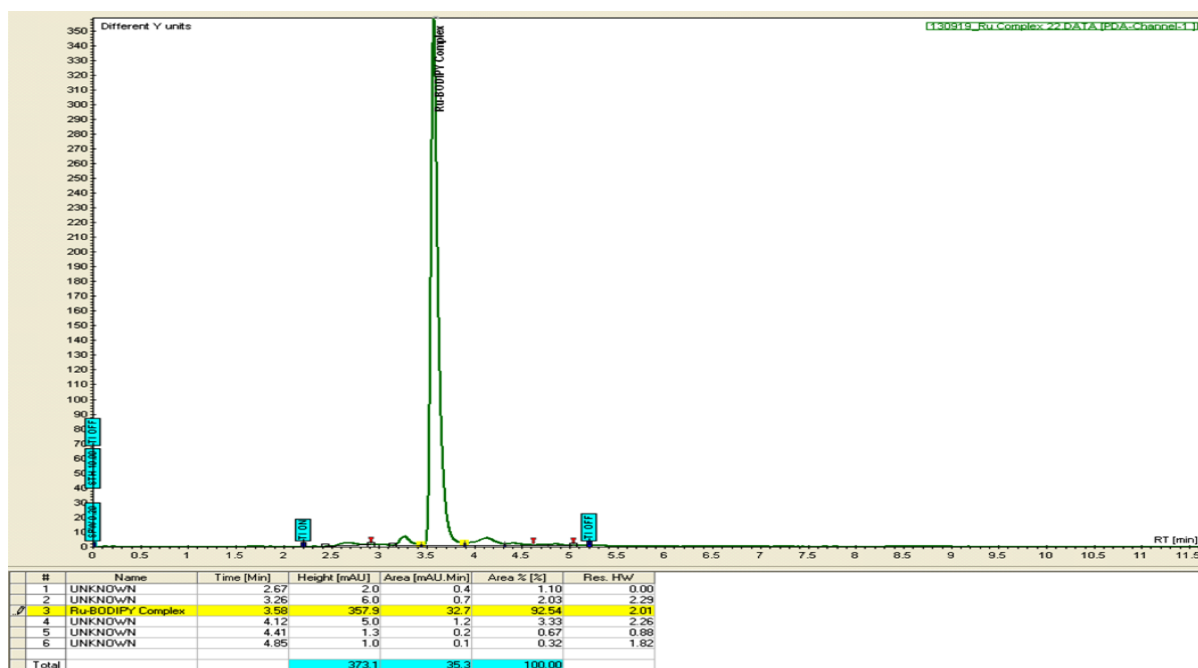

S27. HPLC trace of dyad (9).

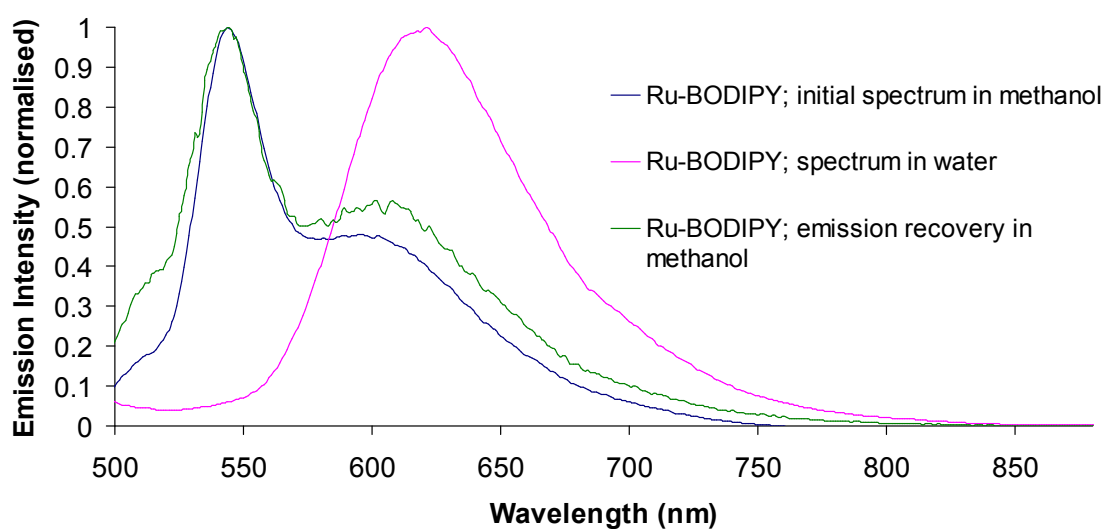

S28. Normalised emission intensity (excited wavelength of 460 nm) of Ru-BODIPY dyad highlighting the luminescent emission recovery upon changing solvent from methanol to water, and back again.

The intensity of the recovered spectrum is lower than the first methanol and water spectra because it is collected by remixing approximately 100  $\mu$ L of the aqueous solution back into pure methanol.
